# Supplementary material
Source: PubMed Central journal article supplement (PMC4288687)
Supplement: JB.02359-14_zjb999093414so1.pdf [file JB.02359-14_zjb999093414so1.pdf]

## *S. aureus*

Within genus : BLAST in 20 species

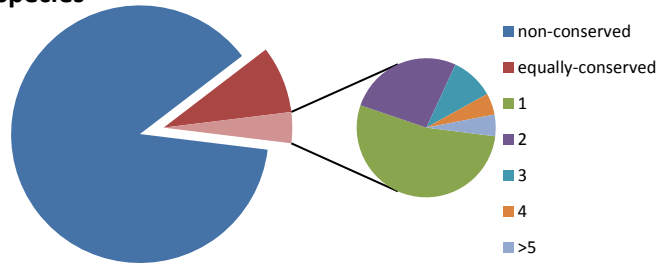

Outside genus

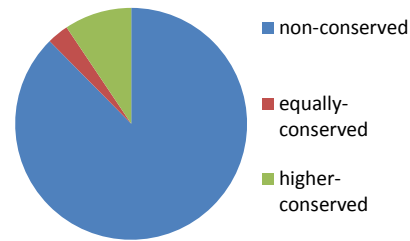

## *S. pneumoniae*

Within genus : BLAST in 41 species

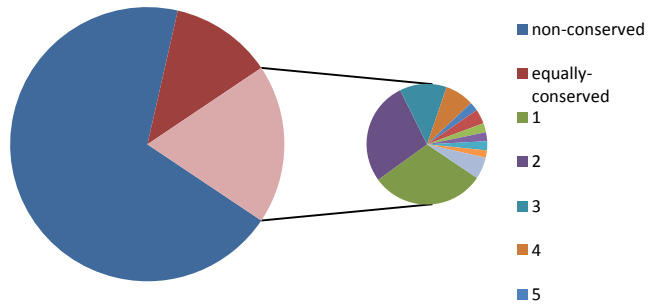

Outside genus

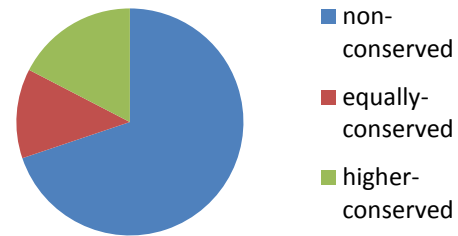

## *E. faecalis*

Within genus : BLAST in 31 species

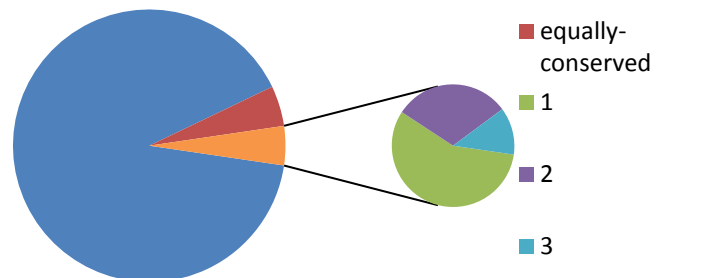

Outside genus

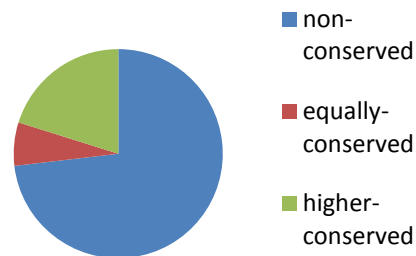

### *H. pylori*

Within genus : BLAST in 42 species

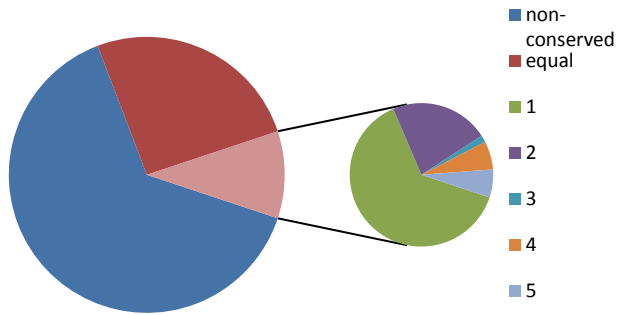

Outside genus

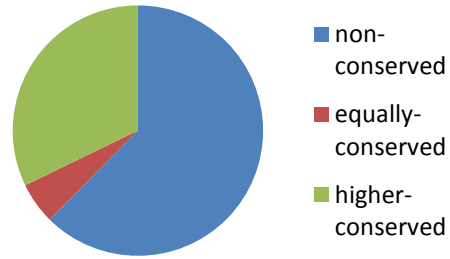

### *L. monocytogenes*

Within genus : BLAST in 42 species

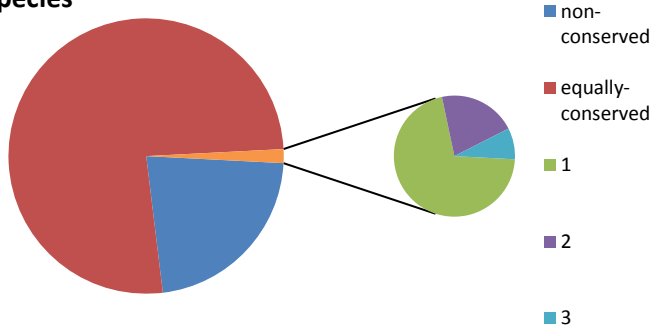

Outside genus

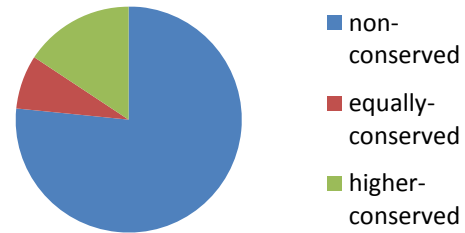

### *P. aeruginosa*

Within genus : BLAST in 29 species

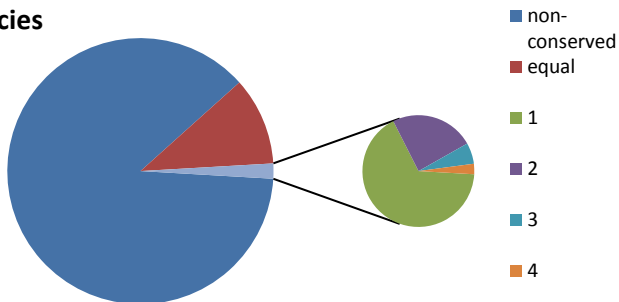

Outside genus

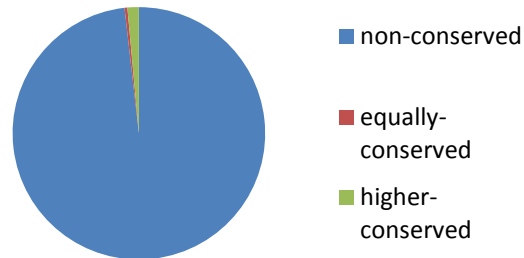

## *S. typhi*

Within genus : BLAST in 7 species

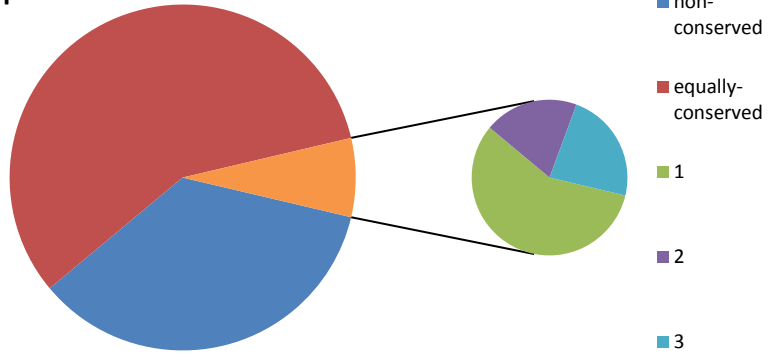

Outside genus

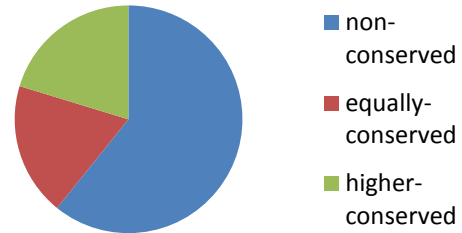

## *V. harveyi*

Within genus : BLAST in 11 species

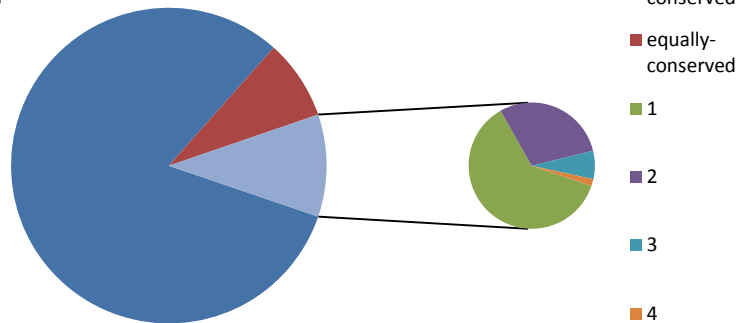

Outside genus

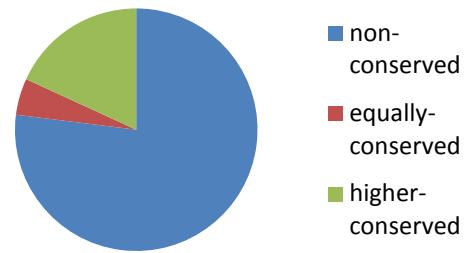

## *C. trachomatis*

Within genus : BLAST in 4 species

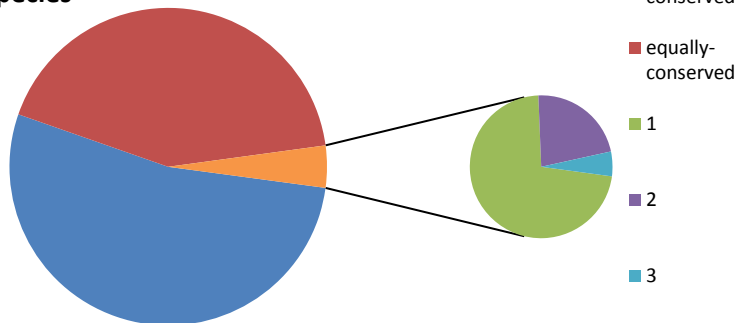

Outside genus

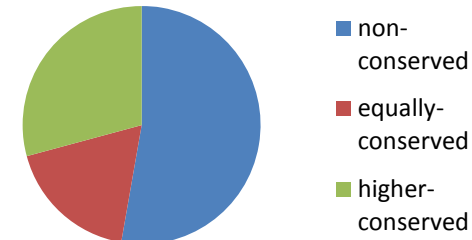

## *S. pyogene*

Within genus : BLAST in 41 species

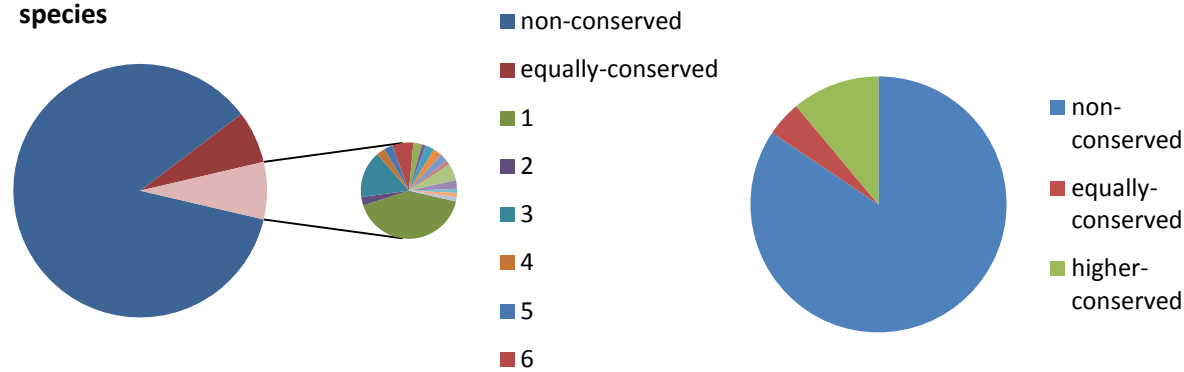

**Supplementary Figure 1.** Conservation distribution and patterns in other ten species. The conservation level is the number of within-genus or outside genus organisms found to have homology of the intergenic region. The intergenic region would be marked as “non-conserved” if its conservation level is less than the extended intergenic region, or “equally” and “higher” if the conservation level is equal or higher than the extended intergenic region. The smaller pie charts of “within-genus” show how conservation levels are distributed in the “higher-conserved” intergenic regions, and the total numbers of “within-genus” organisms are showed above.

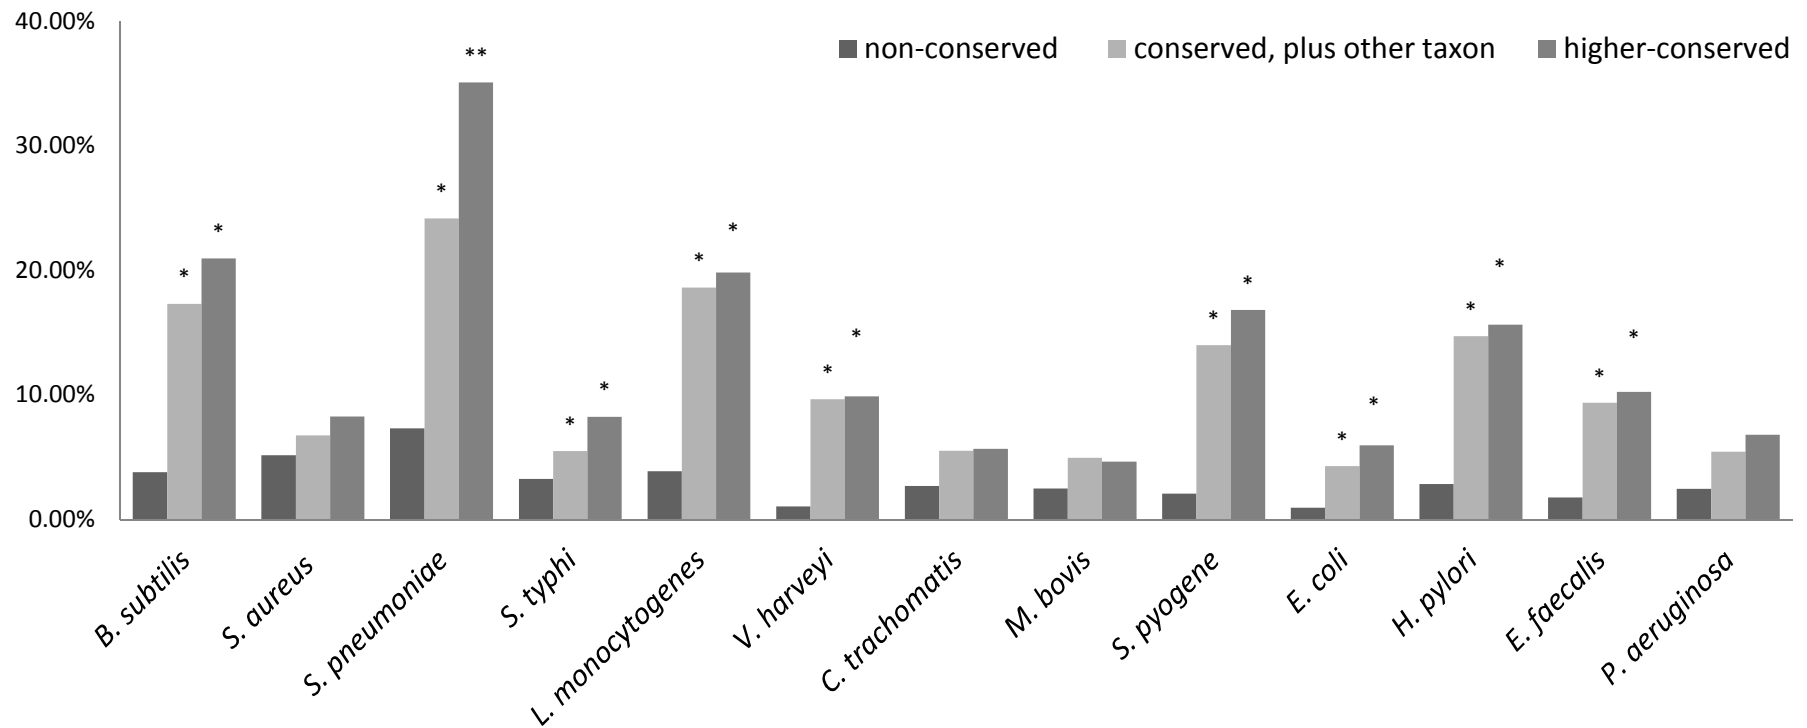

**Supplementary Figure 2.** sRNAs coding region enrichments in intergenic region with different conservation level for outside genus species. The chart above presents the enrichment of sRNAs in intergenic regions conserved “outside genus.” The percentage is defined as the number of sRNA coding intergenic regions relative to all selected intergenic regions. For this figure, a conserved intergenic region refers to any intergenic region that has a conservation level greater than 0 for “outside genus.” The enrichment of sRNAs in intergenic regions conserved “outside genus” was compared to the enrichment in all intergenic regions. The star (\*) denotes: statistically significant enrichment of sRNA compared to non-conserved regions by Fisher Exact Test.

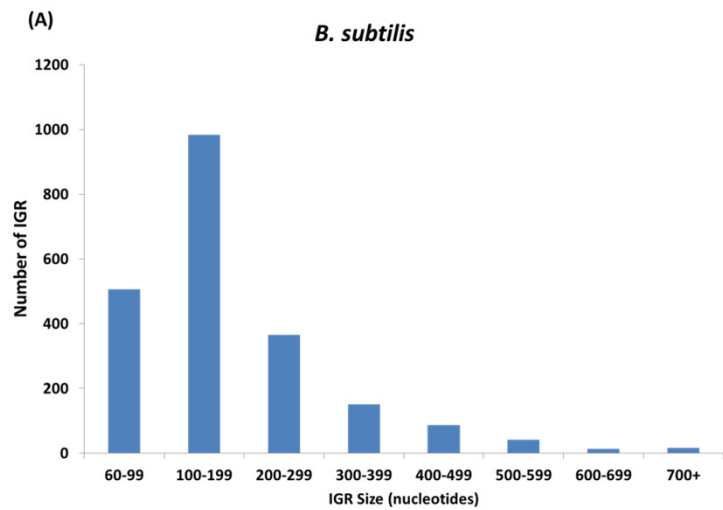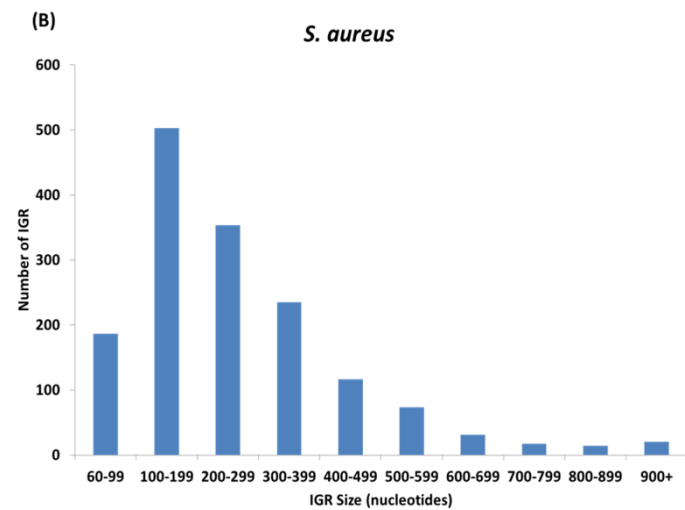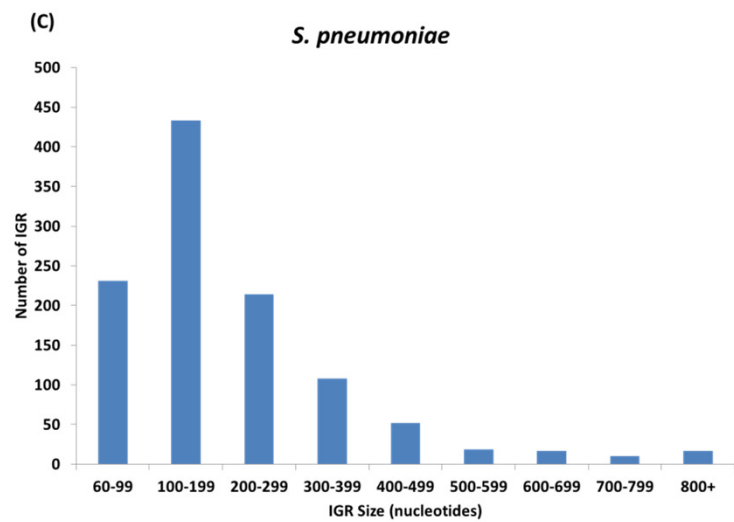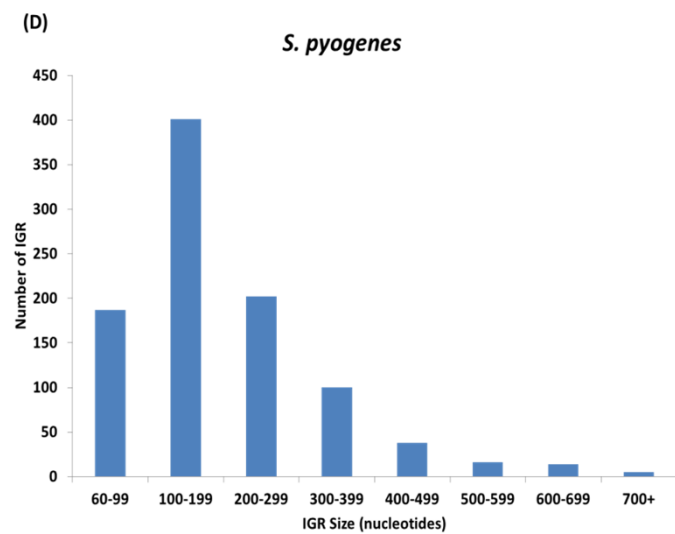

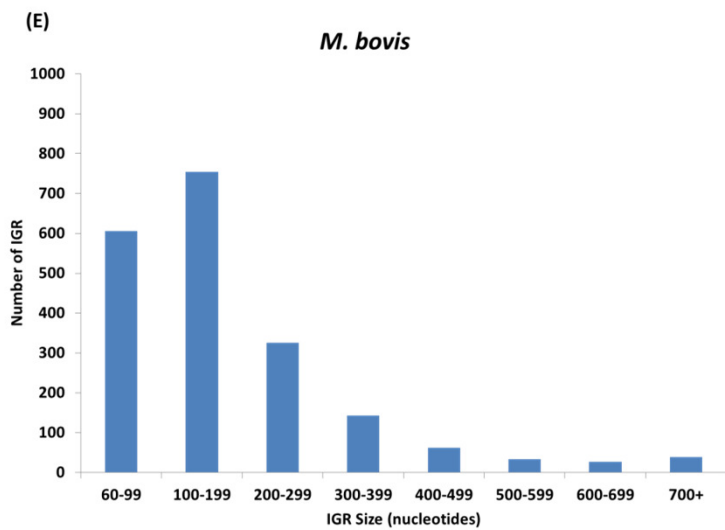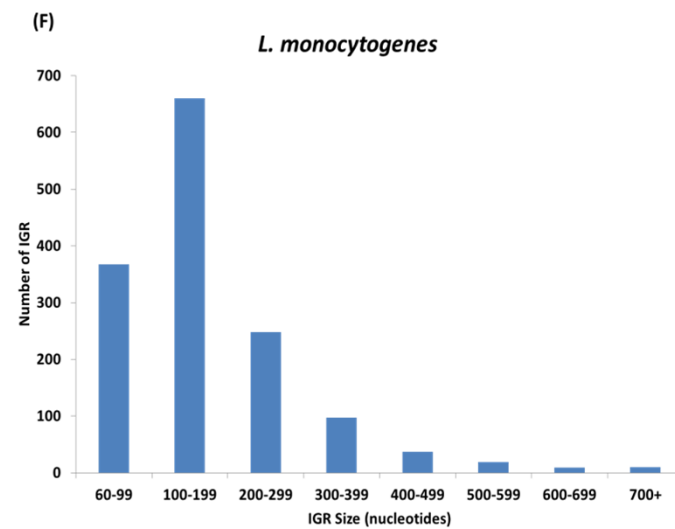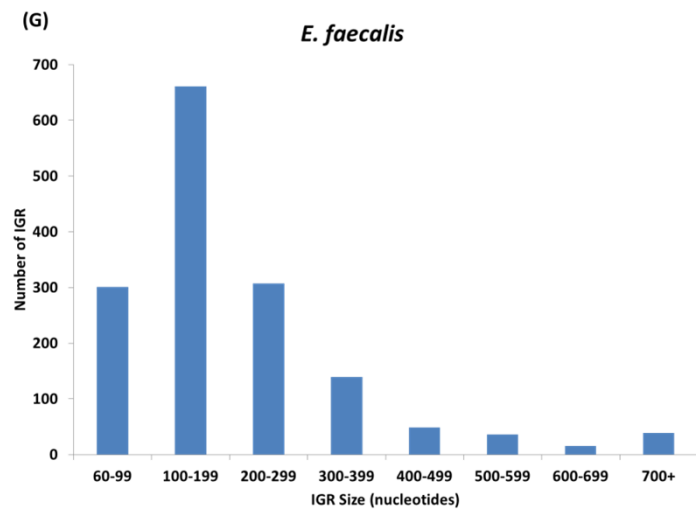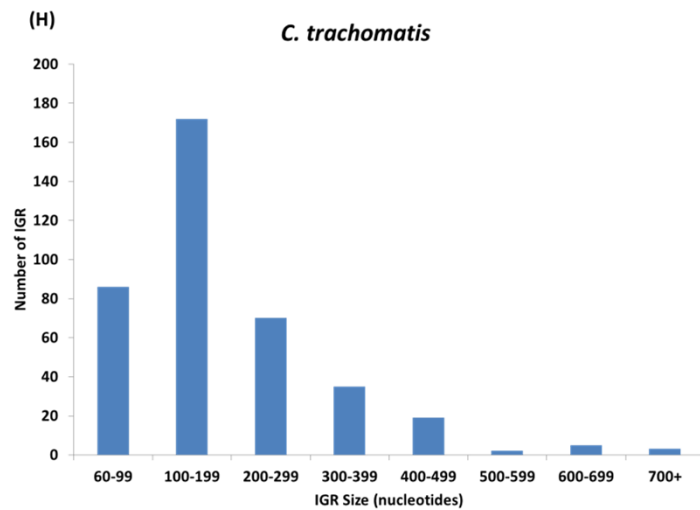

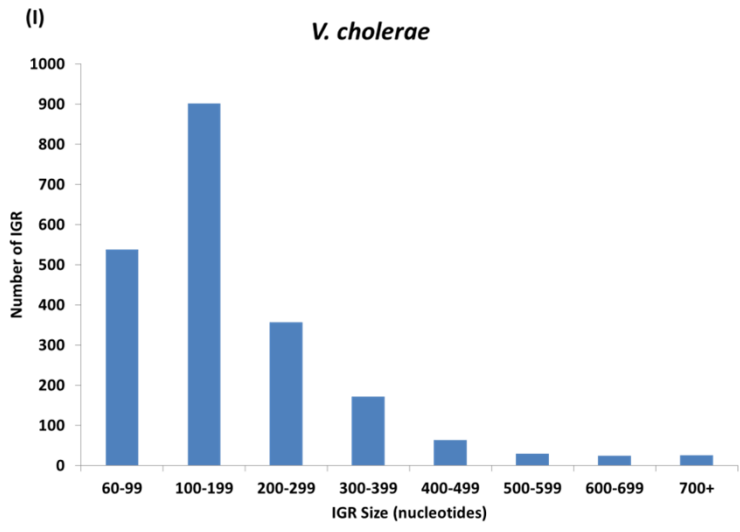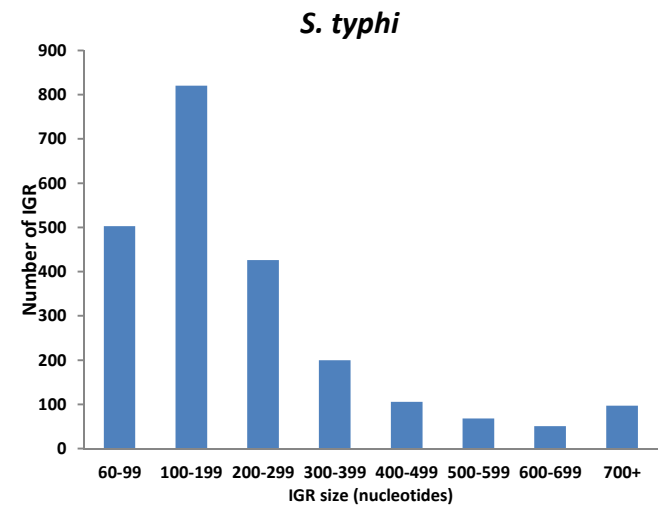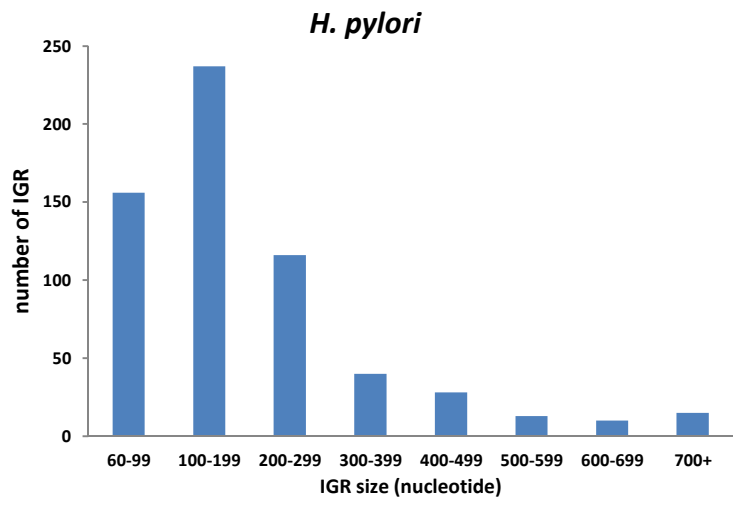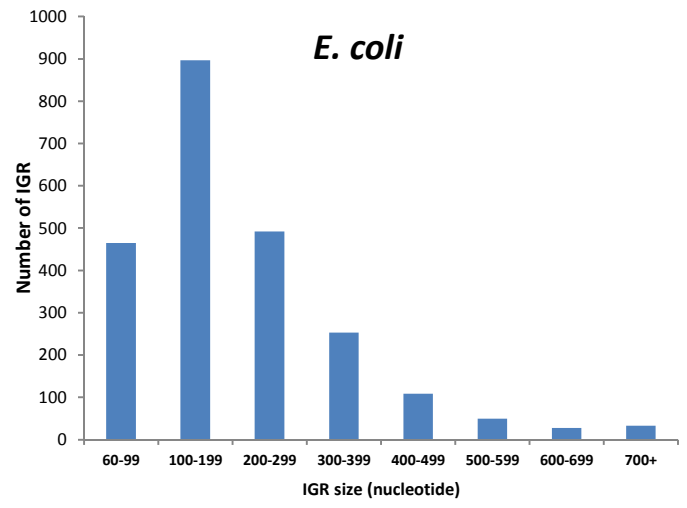



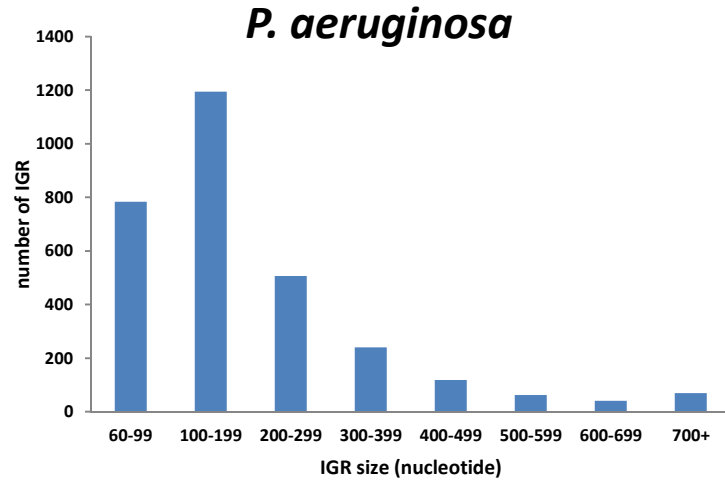

**Supplementary Figure 3.** The distribution of the size of intergenic regions in analyzed species. Intergenic regions with length shorter than 60 nucleotides were not included in this figure.

**Supplementary Table 1: Species list and characteristics**

| Species                 | Gram stain | Pathogenicity                        | References | NCBI accession code |
|-------------------------|------------|--------------------------------------|------------|---------------------|
| <i>V. cholerae</i>      | Negative   | cholera                              | (39–42)    | NC_002505.1         |
| <i>L. monocytogenes</i> | Positive   | listeriosis                          | (43–45)    | NC_003210.1         |
| <i>C. trachomatis</i>   | Negative   | chlamydia                            | (46)       | NC_010280.2         |
| <i>S. aureus</i>        | Positive   | boil or food poisoning               | (47–51)    | NC_002745.2         |
| <i>B. subtilis</i>      | Positive   | None                                 | (52, 53)   | NC_000964.3         |
| <i>S. pneumoniae</i>    | Positive   | pneumonia                            | (54–56)    | NC_003028.3         |
| <i>S. pyogenes</i>      | Positive   | pharyngitis                          | (57)       | NC_007297.1         |
| <i>E. faecalis</i>      | Positive   | endocarditis or Bacteremia           | (58, 59)   | NC_004668.1         |
| <i>M. bovis</i>         | Positive*  | bovine tuberculosis                  | (60,61)    | NC_008769.1         |
| <i>E. coli</i>          | Negative   | None                                 | (62–72)    | NC_000913.3         |
| <i>H. pylori</i>        | Negative   | chronic gastritis and gastric ulcers | (73)       | NC_000915.1         |
| <i>S. typhi</i>         | Negative   | Salmonellosis                        | (74,75,80) | NC_004631.1         |
| <i>P. aeruginosa</i>    | Negative   | Pneumonia                            | (76–79)    | NC_002516.2         |

\*: acid-fast Gram-positive

**Supplementary Table 2. BLAST target species**

| <b>(1) <i>Bacillus</i></b>            |                                                                                                                                                                                                                                                                                                                                                                                                                                                                                       |
|---------------------------------------|---------------------------------------------------------------------------------------------------------------------------------------------------------------------------------------------------------------------------------------------------------------------------------------------------------------------------------------------------------------------------------------------------------------------------------------------------------------------------------------|
| Within genus                          | Outside genus                                                                                                                                                                                                                                                                                                                                                                                                                                                                         |
| 1. <i>Bacillus cereus</i>             | <i>Agrobacterium, Bacteroides, Bordetella, Borrelia, Brucella, Burkholderia, Chlamydia, Clostridium, Deinococcus, Desulfo, Enterobacter, Enterococcus, Escherichia, Geobacter, Haemophilus, Helicobacter, Lactobacillus, Listeria Mycobacterium, Mycoplasma, Neisseria, Pseudomonas, Rhizobium, Rhodobacter, Rhodococcus, Rickettsia, Salmonella, Shigella, Streptococcus, Streptomyces, Staphylococcus, Synechococcus, Thermotoga, Vibrio, Xanthomonas, Yersinia, and Zymomonas.</i> |
| 2. <i>Bacillus thuringiensis</i>      |                                                                                                                                                                                                                                                                                                                                                                                                                                                                                       |
| 3. <i>Bacillus anthracis</i>          |                                                                                                                                                                                                                                                                                                                                                                                                                                                                                       |
| 4. <i>Bacillus mycoides</i>           |                                                                                                                                                                                                                                                                                                                                                                                                                                                                                       |
| 5. <i>Bacillus weihenstephanensis</i> |                                                                                                                                                                                                                                                                                                                                                                                                                                                                                       |
| 6. <i>Bacillus cytotoxicus</i>        |                                                                                                                                                                                                                                                                                                                                                                                                                                                                                       |
| 7. <i>Bacillus atrophaeus</i>         |                                                                                                                                                                                                                                                                                                                                                                                                                                                                                       |
| 8. <i>Bacillus amyloliquefaciens</i>  |                                                                                                                                                                                                                                                                                                                                                                                                                                                                                       |
| 9. <i>Bacillus licheniformis</i>      |                                                                                                                                                                                                                                                                                                                                                                                                                                                                                       |
| 10. <i>Bacillus vallismortis</i>      |                                                                                                                                                                                                                                                                                                                                                                                                                                                                                       |
| 11. <i>Bacillus mojavenensis</i>      |                                                                                                                                                                                                                                                                                                                                                                                                                                                                                       |
| 12. <i>Bacillus megaterium</i>        |                                                                                                                                                                                                                                                                                                                                                                                                                                                                                       |
| 13. <i>Bacillus coagulans</i>         |                                                                                                                                                                                                                                                                                                                                                                                                                                                                                       |
| 14. <i>Bacillus coahuilensis</i>      |                                                                                                                                                                                                                                                                                                                                                                                                                                                                                       |
| 15. <i>Bacillus pumilus</i>           |                                                                                                                                                                                                                                                                                                                                                                                                                                                                                       |
| 16. <i>Bacillus methanolicus</i>      |                                                                                                                                                                                                                                                                                                                                                                                                                                                                                       |
| 17. <i>Bacillus marmarensis</i>       |                                                                                                                                                                                                                                                                                                                                                                                                                                                                                       |
| 18. <i>Bacillus safensis</i>          |                                                                                                                                                                                                                                                                                                                                                                                                                                                                                       |
| 19. <i>Bacillus altitudinis</i>       |                                                                                                                                                                                                                                                                                                                                                                                                                                                                                       |
| 20. <i>Bacillus aerophilus</i>        |                                                                                                                                                                                                                                                                                                                                                                                                                                                                                       |
| 21. <i>Bacillus siamensis</i>         |                                                                                                                                                                                                                                                                                                                                                                                                                                                                                       |
| 22. <i>Bacillus azotoformans</i>      |                                                                                                                                                                                                                                                                                                                                                                                                                                                                                       |
| 23. <i>Bacillus vireti</i>            |                                                                                                                                                                                                                                                                                                                                                                                                                                                                                       |
| 24. <i>Bacillus bataviensis</i>       |                                                                                                                                                                                                                                                                                                                                                                                                                                                                                       |
| 25. <i>Bacillus horikoshii</i>        |                                                                                                                                                                                                                                                                                                                                                                                                                                                                                       |
| 26. <i>Bacillus aquimaris</i>         |                                                                                                                                                                                                                                                                                                                                                                                                                                                                                       |

|                                                                                                                                                                                                                                                                                                                                                                                                                                                                                                                                                                                                                                                                                                                                                                                                                                                                                                                                                                                                               |                                                                                                                                                                                                                                                                                                                                                                                                                                                                                             |
|---------------------------------------------------------------------------------------------------------------------------------------------------------------------------------------------------------------------------------------------------------------------------------------------------------------------------------------------------------------------------------------------------------------------------------------------------------------------------------------------------------------------------------------------------------------------------------------------------------------------------------------------------------------------------------------------------------------------------------------------------------------------------------------------------------------------------------------------------------------------------------------------------------------------------------------------------------------------------------------------------------------|---------------------------------------------------------------------------------------------------------------------------------------------------------------------------------------------------------------------------------------------------------------------------------------------------------------------------------------------------------------------------------------------------------------------------------------------------------------------------------------------|
| <ul style="list-style-type: none"> <li>27. <i>Bacillus simplex</i></li> <li>28. <i>Bacillus lentus</i></li> <li>29. <i>Bacillus smithii</i></li> <li>30. <i>Bacillus cellulosilyticus</i></li> <li>31. <i>Bacillus pseudomycooides</i></li> <li>32. <i>Bacillus pseudofirmus</i></li> <li>33. <i>Bacillus selenitireducens</i></li> <li>34. <i>Bacillus clausii</i></li> <li>35. <i>Bacillus halodurans</i></li> <li>36. <i>Bacillus psychrosaccharolyticus</i></li> <li>37. <i>Bacillus alcalophilus</i></li> </ul>                                                                                                                                                                                                                                                                                                                                                                                                                                                                                          |                                                                                                                                                                                                                                                                                                                                                                                                                                                                                             |
| <b>(2) Chlamydia</b>                                                                                                                                                                                                                                                                                                                                                                                                                                                                                                                                                                                                                                                                                                                                                                                                                                                                                                                                                                                          |                                                                                                                                                                                                                                                                                                                                                                                                                                                                                             |
| Within genus                                                                                                                                                                                                                                                                                                                                                                                                                                                                                                                                                                                                                                                                                                                                                                                                                                                                                                                                                                                                  | Outside genus                                                                                                                                                                                                                                                                                                                                                                                                                                                                               |
| <ul style="list-style-type: none"> <li>1. <i>Chlamydia trachomatis</i></li> <li>2. <i>Chlamydia psittaci</i></li> <li>3. <i>Chlamydia pneumoniae</i></li> <li>4. <i>Chlamydia pecorum</i></li> <li>5. <i>Chlamydia muridarum</i></li> </ul>                                                                                                                                                                                                                                                                                                                                                                                                                                                                                                                                                                                                                                                                                                                                                                   | <p><i>Agrobacterium, Bacillus, Bacteroides, Bordetella, Borrelia, Brucella, Burkholderia, Clostridium, Deinococcus, Desulfo, Enterobacter, Enterococcus, Escherichia, Geobacter, Haemophilus, Helicobacter, Lactobacillus, Listeria Mycobacterium, Mycoplasma, Neisseria, Pseudomonas, Rhizobium, Rhodobacter, Rhodococcus, Rickettsia, Salmonella, Shigella, Streptococcus, Streptomyces, Staphylococcus, Synechococcus, Thermotoga, Vibrio, Xanthomonas, Yersinia, and Zymomonas.</i></p> |
| <b>(3) Enterococcus</b>                                                                                                                                                                                                                                                                                                                                                                                                                                                                                                                                                                                                                                                                                                                                                                                                                                                                                                                                                                                       |                                                                                                                                                                                                                                                                                                                                                                                                                                                                                             |
| Within genus                                                                                                                                                                                                                                                                                                                                                                                                                                                                                                                                                                                                                                                                                                                                                                                                                                                                                                                                                                                                  | Outside genus                                                                                                                                                                                                                                                                                                                                                                                                                                                                               |
| <ul style="list-style-type: none"> <li>1. <i>Enterococcus gallinarum</i></li> <li>2. <i>Enterococcus gilvus</i></li> <li>3. <i>Enterococcus haemoperoxidus</i></li> <li>4. <i>Enterococcus hawaiiensis</i></li> <li>5. <i>Enterococcus hermannienseis</i></li> <li>6. <i>Enterococcus hirae</i></li> <li>7. <i>Enterococcus inusitatus</i></li> <li>8. <i>Enterococcus italicus</i></li> <li>9. <i>Enterococcus lactis</i></li> <li>10. <i>Enterococcus malodoratus</i></li> <li>11. <i>Enterococcus moravienseis</i></li> <li>12. <i>Enterococcus mundtii</i></li> <li>13. <i>Enterococcus pallens</i></li> <li>14. <i>Enterococcus pernyi</i></li> <li>15. <i>Enterococcus phoeniculicola</i></li> <li>16. <i>Enterococcus plantarum</i></li> <li>17. <i>Enterococcus aquimarinus</i></li> <li>18. <i>Enterococcus asini</i></li> <li>19. <i>Enterococcus avium</i></li> <li>20. <i>Enterococcus azikeevi</i></li> <li>21. <i>Enterococcus caccae</i></li> <li>22. <i>Enterococcus camelliae</i></li> </ul> | <p><i>Agrobacterium, Bacillus, Bacteroides, Bordetella, Borrelia, Brucella, Burkholderia, Chlamydia, Clostridium, Deinococcus, Desulfo, Escherichia, Geobacter, Haemophilus, Helicobacter, Lactobacillus, Listeria Mycobacterium, Mycoplasma, Neisseria, Pseudomonas, Rhizobium, Rhodobacter, Rhodococcus, Rickettsia, Salmonella, Shigella, Streptococcus, Streptomyces, Staphylococcus, Synechococcus, Thermotoga, Vibrio, Xanthomonas, Yersinia, and Zymomonas.</i></p>                  |

|                                                                                                                                                                                                                                                                                                                                                                                                                                                                                                                                                                                                                                                                                                                                                                                                                                                                                                                                                                                                                                                                                                                                                 |                                                                                                                                                                                                                                                                                                                                                                                                                                                                             |
|-------------------------------------------------------------------------------------------------------------------------------------------------------------------------------------------------------------------------------------------------------------------------------------------------------------------------------------------------------------------------------------------------------------------------------------------------------------------------------------------------------------------------------------------------------------------------------------------------------------------------------------------------------------------------------------------------------------------------------------------------------------------------------------------------------------------------------------------------------------------------------------------------------------------------------------------------------------------------------------------------------------------------------------------------------------------------------------------------------------------------------------------------|-----------------------------------------------------------------------------------------------------------------------------------------------------------------------------------------------------------------------------------------------------------------------------------------------------------------------------------------------------------------------------------------------------------------------------------------------------------------------------|
| <ul style="list-style-type: none"> <li>23. <i>Enterococcus canintestini</i></li> <li>24. <i>Enterococcus canis</i></li> <li>25. <i>Enterococcus casseliflavus</i></li> <li>26. <i>Enterococcus cecorum</i></li> <li>27. <i>Enterococcus columbae</i></li> <li>28. <i>Enterococcus devriesei</i></li> <li>29. <i>Enterococcus dispar</i></li> <li>30. <i>Enterococcus durans</i></li> <li>31. <i>Enterococcus ENA07</i></li> </ul>                                                                                                                                                                                                                                                                                                                                                                                                                                                                                                                                                                                                                                                                                                               |                                                                                                                                                                                                                                                                                                                                                                                                                                                                             |
| <b>(4) Escherichia</b>                                                                                                                                                                                                                                                                                                                                                                                                                                                                                                                                                                                                                                                                                                                                                                                                                                                                                                                                                                                                                                                                                                                          |                                                                                                                                                                                                                                                                                                                                                                                                                                                                             |
| Within genus                                                                                                                                                                                                                                                                                                                                                                                                                                                                                                                                                                                                                                                                                                                                                                                                                                                                                                                                                                                                                                                                                                                                    | Outside genus                                                                                                                                                                                                                                                                                                                                                                                                                                                               |
| <ul style="list-style-type: none"> <li>1. <i>Escherichia albertii</i></li> <li>2. <i>Escherichia fergusonii</i></li> <li>3. <i>Escherichia faecalis</i></li> <li>4. <i>Escherichia senegalensis</i></li> <li>5. <i>Escherichia vulneris</i></li> <li>6. <i>Escherichia hermannii</i></li> </ul>                                                                                                                                                                                                                                                                                                                                                                                                                                                                                                                                                                                                                                                                                                                                                                                                                                                 | <p><i>Agrobacterium, Bacillus, Bacteroides, Bordetella, Borrelia, Brucella, Burkholderia, Chlamydia, Clostridium, Deinococcus, Desulfo, Enterococcus, Geobacter, Haemophilus, Helicobacter, Lactobacillus, Listeria Mycobacterium, Mycoplasma, Neisseria, Pseudomonas, Rhizobium, Rhodobacter, Rhodococcus, Rickettsia, Salmonella, Shigella, Streptococcus, Streptomyces, Staphylococcus, Synechococcus, Thermotoga, Vibrio, Xanthomonas, Yersinia, and Zymomonas.</i></p> |
| <b>(5) Helicobacter</b>                                                                                                                                                                                                                                                                                                                                                                                                                                                                                                                                                                                                                                                                                                                                                                                                                                                                                                                                                                                                                                                                                                                         |                                                                                                                                                                                                                                                                                                                                                                                                                                                                             |
| Within genus                                                                                                                                                                                                                                                                                                                                                                                                                                                                                                                                                                                                                                                                                                                                                                                                                                                                                                                                                                                                                                                                                                                                    | Outside genus                                                                                                                                                                                                                                                                                                                                                                                                                                                               |
| <ul style="list-style-type: none"> <li>1. <i>Helicobacter acinonychis</i></li> <li>2. <i>Helicobacter anseris</i></li> <li>3. <i>Helicobacter apodemus</i></li> <li>4. <i>Helicobacter aurati</i></li> <li>5. <i>Helicobacter baculiformis</i></li> <li>6. <i>Helicobacter bilis</i></li> <li>7. <i>Helicobacter bizzozeronii</i></li> <li>8. <i>Helicobacter brantae</i></li> <li>9. <i>Helicobacter callitrichis</i></li> <li>10. <i>Helicobacter canadensis</i></li> <li>11. <i>Helicobacter canis</i></li> <li>12. <i>Helicobacter cetorum</i></li> <li>13. <i>Helicobacter cholecystus</i></li> <li>14. <i>Helicobacter cinaedi</i></li> <li>15. <i>Helicobacter cynogastricus</i></li> <li>16. <i>Helicobacter equorum</i></li> <li>17. <i>Helicobacter felis</i></li> <li>18. <i>Helicobacter fennelliae</i></li> <li>19. <i>Helicobacter ganmani</i></li> <li>20. <i>Helicobacter heilmannii</i></li> <li>21. <i>Helicobacter hepaticus</i></li> <li>22. <i>Helicobacter macacae</i></li> <li>23. <i>Helicobacter magdeburgensis</i></li> <li>24. <i>Helicobacter marmotae</i></li> <li>25. <i>Helicobacter mastomyrinus</i></li> </ul> | <p><i>Agrobacterium, Bacillus, Bacteroides, Bordetella, Borrelia, Brucella, Burkholderia, Chlamydia, Clostridium, Deinococcus, Desulfo, Enterococcus, Escherichia, Geobacter, Haemophilus, Lactobacillus, Listeria Mycobacterium, Mycoplasma, Neisseria, Pseudomonas, Rhizobium, Rhodobacter, Rhodococcus, Rickettsia, Salmonella, Shigella, Streptococcus, Streptomyces, Staphylococcus, Synechococcus, Thermotoga, Vibrio, Xanthomonas, Yersinia, and Zymomonas.</i></p>  |

|                                                                                                                                                                                                                                                                                                                                                                                                                                                                                                                                                                                                                                                                                         |                                                                                                                                                                                                                                                                                                                                                                                                                                                  |
|-----------------------------------------------------------------------------------------------------------------------------------------------------------------------------------------------------------------------------------------------------------------------------------------------------------------------------------------------------------------------------------------------------------------------------------------------------------------------------------------------------------------------------------------------------------------------------------------------------------------------------------------------------------------------------------------|--------------------------------------------------------------------------------------------------------------------------------------------------------------------------------------------------------------------------------------------------------------------------------------------------------------------------------------------------------------------------------------------------------------------------------------------------|
| <p>26. <i>Helicobacter mesocricetorum</i><br/> 27. <i>Helicobacter muricola</i><br/> 28. <i>Helicobacter muridarum</i><br/> 29. <i>Helicobacter mustelae</i><br/> 30. <i>Helicobacter pametensis</i><br/> 31. <i>Helicobacter peregrinus</i><br/> 32. <i>Helicobacter pullorum</i><br/> 33. <i>Helicobacter rappini</i><br/> 34. <i>Helicobacter rodentium</i><br/> 35. <i>Helicobacter salomonis</i><br/> 36. <i>Helicobacter suis</i><br/> 37. <i>Helicobacter suncus</i><br/> 38. <i>Helicobacter trogontum</i><br/> 39. <i>Helicobacter tursiopsae</i><br/> 40. <i>Helicobacter typhlonius</i><br/> 41. <i>Helicobacter vulpecula</i><br/> 42. <i>Helicobacter winghamensis</i></p> |                                                                                                                                                                                                                                                                                                                                                                                                                                                  |
| <b>(6) Listeria</b>                                                                                                                                                                                                                                                                                                                                                                                                                                                                                                                                                                                                                                                                     |                                                                                                                                                                                                                                                                                                                                                                                                                                                  |
| Within genus                                                                                                                                                                                                                                                                                                                                                                                                                                                                                                                                                                                                                                                                            | Outside genus                                                                                                                                                                                                                                                                                                                                                                                                                                    |
| <p>1. <i>Listeria seeligeri</i><br/> 2. <i>Listeria innocua</i><br/> 3. <i>Listeria welshimeri</i><br/> 4. <i>Listeria grayi</i></p>                                                                                                                                                                                                                                                                                                                                                                                                                                                                                                                                                    | <p><i>Agrobacterium, Bacillus, Bacteroides, Bordetella, Borrelia, Brucella, Burkholderia, Chlamydia, Clostridium, Deinococcus, Desulfo, Enterobacter, Escherichia, Geobacter, Haemophilus, Helicobacter, Lactobacillus, Mycobacterium, Mycoplasma, Neisseria, Pseudomonas, Rhizobium, Rhodobacter, Rhodococcus, Rickettsia, Salmonella, Shigella, Streptomyces, Synechococcus, Thermotoga, Vibrio, Xanthomonas, Yersinia, and Zymomonas.</i></p> |
| <b>(7) Mycobacterium</b>                                                                                                                                                                                                                                                                                                                                                                                                                                                                                                                                                                                                                                                                |                                                                                                                                                                                                                                                                                                                                                                                                                                                  |
| Within genus                                                                                                                                                                                                                                                                                                                                                                                                                                                                                                                                                                                                                                                                            | Outside genus                                                                                                                                                                                                                                                                                                                                                                                                                                    |
| <p>1. <i>Mycobacteria MCS</i><br/> 2. <i>Mycobacteria JLS</i><br/> 3. <i>Mycobacteria KMS</i><br/> 4. <i>Mycobacteria abscessus</i><br/> 5. <i>Mycobacteria avium</i><br/> 6. <i>Mycobacteria ulcerans</i><br/> 7. <i>Mycobacteria leprae</i><br/> 8. <i>Mycobacteria tuberculosis</i><br/> 9. <i>Mycobacteria smegmatis</i></p>                                                                                                                                                                                                                                                                                                                                                        | <p><i>Agrobacterium, Bacillus, Bacteroides, Bordetella, Borrelia, Brucella, Burkholderia, Chlamydia, Clostridium, Deinococcus, Desulfo, Enterobacter, Escherichia, Geobacter, Haemophilus, Helicobacter, Lactobacillus, Listeria, Mycoplasma, Neisseria, Pseudomonas, Rhizobium, Rhodobacter, Rhodococcus, Rickettsia, Salmonella, Shigella, Streptomyces, Synechococcus, Thermotoga, Vibrio, Xanthomonas, Yersinia, and Zymomonas.</i></p>      |
| <b>(8) Pseudomonas</b>                                                                                                                                                                                                                                                                                                                                                                                                                                                                                                                                                                                                                                                                  |                                                                                                                                                                                                                                                                                                                                                                                                                                                  |
| Within genus                                                                                                                                                                                                                                                                                                                                                                                                                                                                                                                                                                                                                                                                            | Outside genus                                                                                                                                                                                                                                                                                                                                                                                                                                    |
| <p>1. <i>Pseudomonas syringae</i><br/> 2. <i>Pseudomonas savastanoi</i><br/> 3. <i>Pseudomonas amygdali</i></p>                                                                                                                                                                                                                                                                                                                                                                                                                                                                                                                                                                         | <p><i>Agrobacterium, Bacillus, Bacteroides, Bordetella, Borrelia, Brucella, Burkholderia, Chlamydia, Clostridium,</i></p>                                                                                                                                                                                                                                                                                                                        |

|                                                                                                                                                                                                                                                                                                                                                                                                                                                                                                                                                                                                                                                                                                                                                                                                                                                                                                                                                                                                                                                                                                                                                                                                                   |                                                                                                                                                                                                                                                                                                                                                                                                                                                                            |
|-------------------------------------------------------------------------------------------------------------------------------------------------------------------------------------------------------------------------------------------------------------------------------------------------------------------------------------------------------------------------------------------------------------------------------------------------------------------------------------------------------------------------------------------------------------------------------------------------------------------------------------------------------------------------------------------------------------------------------------------------------------------------------------------------------------------------------------------------------------------------------------------------------------------------------------------------------------------------------------------------------------------------------------------------------------------------------------------------------------------------------------------------------------------------------------------------------------------|----------------------------------------------------------------------------------------------------------------------------------------------------------------------------------------------------------------------------------------------------------------------------------------------------------------------------------------------------------------------------------------------------------------------------------------------------------------------------|
| <ol style="list-style-type: none"> <li>4. <i>Pseudomonas syringae</i> group genomsp. 3</li> <li>5. <i>Pseudomonas fuscovaginae</i></li> <li>6. <i>Pseudomonas avellanae</i></li> <li>7. <i>Pseudomonas viridiflava</i></li> <li>8. <i>Pseudomonas coronafaciens</i></li> <li>9. <i>Pseudomonas pseudoalcaligenes</i></li> <li>10. <i>Pseudomonas mendocina</i></li> <li>11. <i>Pseudomonas oleovorans</i></li> <li>12. <i>Pseudomonas fluorescens</i></li> <li>13. <i>Pseudomonas tolaasii</i></li> <li>14. <i>Pseudomonas mandelii</i></li> <li>15. <i>Pseudomonas synxantha</i></li> <li>16. <i>Pseudomonas putida</i></li> <li>17. <i>Pseudomonas monteilii</i></li> <li>18. <i>Pseudomonas fulva</i></li> <li>19. <i>Pseudomonas stutzeri</i></li> <li>20. <i>Pseudomonas chlororaphis</i></li> <li>21. <i>Pseudomonas fragi</i></li> <li>22. <i>Pseudomonas brassicacearum</i></li> <li>23. <i>Pseudomonas alcaliphila</i></li> <li>24. <i>Pseudomonas kilonensis</i></li> <li>25. <i>Pseudomonas extremaustralis</i></li> <li>26. <i>Pseudomonas psychrotolerans</i></li> <li>27. <i>Pseudomonas agarici</i></li> <li>28. <i>Pseudomonas gingeri</i></li> <li>29. <i>Pseudomonas entomophila</i></li> </ol> | <p><i>Deinococcus, Desulfo, Enterobacter, Escherichia, Geobacter, Haemophilus, Helicobacter, Lactobacillus, Listeria Mycobacterium, Mycoplasma, Neisseria, Pseudomonas, Rhizobium, Rhodobacter, Rhodococcus, Rickettsia, Salmonella, Shigella, Streptomyces, Synechococcus, Thermotoga, Vibrio, Xanthomonas, Yersinia, and Zymomonas.</i></p>                                                                                                                              |
| <b>(9) Salmonella</b>                                                                                                                                                                                                                                                                                                                                                                                                                                                                                                                                                                                                                                                                                                                                                                                                                                                                                                                                                                                                                                                                                                                                                                                             |                                                                                                                                                                                                                                                                                                                                                                                                                                                                            |
| Within genus                                                                                                                                                                                                                                                                                                                                                                                                                                                                                                                                                                                                                                                                                                                                                                                                                                                                                                                                                                                                                                                                                                                                                                                                      | Outside genus                                                                                                                                                                                                                                                                                                                                                                                                                                                              |
| <ol style="list-style-type: none"> <li>1. <i>Citrobacter farmeri</i></li> <li>2. <i>Citrobacter freundii</i> complex</li> <li>3. <i>Citrobacter intermedius</i></li> <li>4. <i>Citrobacter koseri</i></li> <li>5. <i>Citrobacter rodentium</i></li> <li>6. <i>Salmonella bongori</i></li> <li>7. <i>Salmonella subterranea</i></li> </ol>                                                                                                                                                                                                                                                                                                                                                                                                                                                                                                                                                                                                                                                                                                                                                                                                                                                                         | <p><i>Agrobacterium, Bacillus, Bacteroides, Bordetella, Borrelia, Brucella, Burkholderia, Chlamydia, Clostridium, Deinococcus, Desulfo, Enterobacter, Enterococcus, Escherichia, Geobacter, Haemophilus, Helicobacter, Lactobacillus, Listeria Mycobacterium, Mycoplasma, Neisseria, Pseudomonas, Rhizobium, Rhodobacter, Rhodococcus, Rickettsia, Shigella, Streptococcus, Streptomyces, Synechococcus, Thermotoga, Vibrio, Xanthomonas, Yersinia, and Zymomonas.</i></p> |
| <b>(10) Staphylococcus</b>                                                                                                                                                                                                                                                                                                                                                                                                                                                                                                                                                                                                                                                                                                                                                                                                                                                                                                                                                                                                                                                                                                                                                                                        |                                                                                                                                                                                                                                                                                                                                                                                                                                                                            |
| Within genus                                                                                                                                                                                                                                                                                                                                                                                                                                                                                                                                                                                                                                                                                                                                                                                                                                                                                                                                                                                                                                                                                                                                                                                                      | Outside genus                                                                                                                                                                                                                                                                                                                                                                                                                                                              |
| <ol style="list-style-type: none"> <li>1. <i>Staphylococcus epidermidis</i></li> <li>2. <i>Staphylococcus lugdunensis</i></li> <li>3. <i>Staphylococcus warneri</i></li> <li>4. <i>Staphylococcus hominis</i></li> <li>5. <i>Staphylococcus saprophyticus</i></li> </ol>                                                                                                                                                                                                                                                                                                                                                                                                                                                                                                                                                                                                                                                                                                                                                                                                                                                                                                                                          | <p><i>Agrobacterium, Bacillus, Bacteroides, Bordetella, Borrelia, Brucella, Burkholderia, Chlamydia, Clostridium, Deinococcus, Desulfo, Enterobacter, Enterococcus, Escherichia, Geobacter,</i></p>                                                                                                                                                                                                                                                                        |

|                                                                                                                                                                                                                                                                                                                                                                                                                                                                                                                                                                                                     |                                                                                                                                                                                                                                                                                           |
|-----------------------------------------------------------------------------------------------------------------------------------------------------------------------------------------------------------------------------------------------------------------------------------------------------------------------------------------------------------------------------------------------------------------------------------------------------------------------------------------------------------------------------------------------------------------------------------------------------|-------------------------------------------------------------------------------------------------------------------------------------------------------------------------------------------------------------------------------------------------------------------------------------------|
| 6. <i>Staphylococcus pseudintermedius</i><br>7. <i>Staphylococcus simulans</i><br>8. <i>Staphylococcus capitis</i><br>9. <i>Staphylococcus haemolyticus</i><br>10. <i>Staphylococcus massiliensis</i><br>11. <i>Staphylococcus lentus</i><br>12. <i>Staphylococcus vitulinus</i><br><br>13. <i>Staphylococcus equorum</i><br><br>14. <i>Staphylococcus intermedius</i><br>15. <i>Staphylococcus delphini</i><br>16. <i>Staphylococcus simiae</i><br>17. <i>Staphylococcus caprae</i><br>18. <i>Staphylococcus carnosus</i><br>19. <i>Staphylococcus hyicus</i><br>20. <i>Staphylococcus xylosus</i> | <i>Haemophilus, Helicobacter, Lactobacillus, Listeria Mycobacterium, Mycoplasma, Neisseria, Pseudomonas, Rhizobium, Rhodobacter, Rhodococcus, Rickettsia, Salmonella, Shigella, Streptococcus, Streptomyces, Synechococcus, Thermotoga, Vibrio, Xanthomonas, Yersinia, and Zymomonas.</i> |
|-----------------------------------------------------------------------------------------------------------------------------------------------------------------------------------------------------------------------------------------------------------------------------------------------------------------------------------------------------------------------------------------------------------------------------------------------------------------------------------------------------------------------------------------------------------------------------------------------------|-------------------------------------------------------------------------------------------------------------------------------------------------------------------------------------------------------------------------------------------------------------------------------------------|

**(11) Streptococcus**

| Within genus                                                                                                                                                                                                                                                                                                                                                                                                                                                                                                                                                                                                                                                                                                                                                                                                                                                                                                                                                                                                                                                                                                                                                                       | Outside genus                                                                                                                                                                                                                                                                                                                                                                                                                                                    |
|------------------------------------------------------------------------------------------------------------------------------------------------------------------------------------------------------------------------------------------------------------------------------------------------------------------------------------------------------------------------------------------------------------------------------------------------------------------------------------------------------------------------------------------------------------------------------------------------------------------------------------------------------------------------------------------------------------------------------------------------------------------------------------------------------------------------------------------------------------------------------------------------------------------------------------------------------------------------------------------------------------------------------------------------------------------------------------------------------------------------------------------------------------------------------------|------------------------------------------------------------------------------------------------------------------------------------------------------------------------------------------------------------------------------------------------------------------------------------------------------------------------------------------------------------------------------------------------------------------------------------------------------------------|
| 1. <i>Streptococcus agalactiae</i><br>2. <i>Streptococcus pneumoniae</i><br>3. <i>Streptococcus mutans</i><br>4. <i>Streptococcus pyogenes</i><br>5. <i>Streptococcus sobrinus</i><br>6. <i>Streptococcus sanguinis</i><br>7. <i>Streptococcus suis</i><br>8. <i>Streptococcus mitis</i><br>9. <i>Streptococcus thermophiles</i><br>10. <i>Streptococcus oralis</i><br>11. <i>Streptococcus dysgalactiae</i><br>12. <i>Streptococcus equi</i><br>13. <i>Streptococcus anginosus</i><br>14. <i>Streptococcus intermedius</i><br>15. <i>Streptococcus constellatus</i><br>16. <i>Streptococcus parasanguinis</i><br>17. <i>Streptococcus salivarius</i><br>18. <i>Streptococcus infantis</i><br>19. <i>Streptococcus gallolyticus</i><br>20. <i>Streptococcus pseudopneumoniae</i><br>21. <i>Streptococcus vestibularis</i><br>22. <i>Streptococcus parauberis</i><br>23. <i>Streptococcus pseudoporcinus</i><br>24. <i>Streptococcus urinalis</i><br>25. <i>Streptococcus downei</i><br>26. <i>Streptococcus equinus</i><br>27. <i>Streptococcus infantarius</i><br>28. <i>Streptococcus macedonicus</i><br>29. <i>Streptococcus lutetiensis</i><br>30. <i>Streptococcus rattus</i> | <i>Agrobacterium, Bacillus, Bacteroides, Bordetella, Borrelia, Brucella, Burkholderia, Chlamydia, Clostridium, Deinococcus, Desulfo, Enterobacter, Enterococcus, Escherichia, Geobacter, Haemophilus, Helicobacter, Lactobacillus, Listeria Mycobacterium, Mycoplasma, Neisseria, Pseudomonas, Rhizobium, Rhodobacter, Rhodococcus, Rickettsia, Salmonella, Shigella, Streptomyces, Synechococcus, Thermotoga, Vibrio, Xanthomonas, Yersinia, and Zymomonas.</i> |

|                                       |                                                                                                                                                                                                                                                                                                                                                                                                                                             |
|---------------------------------------|---------------------------------------------------------------------------------------------------------------------------------------------------------------------------------------------------------------------------------------------------------------------------------------------------------------------------------------------------------------------------------------------------------------------------------------------|
| 31. <i>Streptococcus canis</i>        |                                                                                                                                                                                                                                                                                                                                                                                                                                             |
| 32. <i>Streptococcus pasteurianus</i> |                                                                                                                                                                                                                                                                                                                                                                                                                                             |
| 33. <i>Streptococcus cristatus</i>    |                                                                                                                                                                                                                                                                                                                                                                                                                                             |
| 34. <i>Streptococcus australis</i>    |                                                                                                                                                                                                                                                                                                                                                                                                                                             |
| 35. <i>Streptococcus peroris</i>      |                                                                                                                                                                                                                                                                                                                                                                                                                                             |
| 36. <i>Streptococcus criceti</i>      |                                                                                                                                                                                                                                                                                                                                                                                                                                             |
| 37. <i>Streptococcus porcinus</i>     |                                                                                                                                                                                                                                                                                                                                                                                                                                             |
| 38. <i>Streptococcus ictaluri</i>     |                                                                                                                                                                                                                                                                                                                                                                                                                                             |
| 39. <i>Streptococcus macacae</i>      |                                                                                                                                                                                                                                                                                                                                                                                                                                             |
| 40. <i>Streptococcus iniae</i>        |                                                                                                                                                                                                                                                                                                                                                                                                                                             |
| 41. <i>Streptococcus uberis</i>       |                                                                                                                                                                                                                                                                                                                                                                                                                                             |
| 42. <i>Streptococcus gordonii</i>     |                                                                                                                                                                                                                                                                                                                                                                                                                                             |
| <b>(12) <i>Vibrio</i></b>             |                                                                                                                                                                                                                                                                                                                                                                                                                                             |
| Within genus                          | Outside genus                                                                                                                                                                                                                                                                                                                                                                                                                               |
| 1. <i>Vibrio alginolyticus</i>        | <i>Agrobacterium, Bacillus, Bacteroides, Bordetella, Borrelia, Brucella, Burkholderia, Chlamydia, Clostridium, Deinococcus, Desulfo, Enterobacter, Escherichia, Geobacter, Haemophilus, Helicobacter, Lactobacillus, Listeria, Mycobacterium, Mycoplasma, Neisseria, Pseudomonas, Rhizobium, Rhodobacter, Rhodococcus, Rickettsia, Salmonella, Shigella, Streptomyces, Synechococcus, Thermotoga, Xanthomonas, Yersinia, and Zymomonas.</i> |
| 2. <i>Vibrio caribbenthicus</i>       |                                                                                                                                                                                                                                                                                                                                                                                                                                             |
| 3. <i>Vibrio corallilyticus</i>       |                                                                                                                                                                                                                                                                                                                                                                                                                                             |
| 4. <i>Vibrio furnissi</i>             |                                                                                                                                                                                                                                                                                                                                                                                                                                             |
| 5. <i>Vibrio mimicus</i>              |                                                                                                                                                                                                                                                                                                                                                                                                                                             |
| 6. <i>Vibrio orientalis</i>           |                                                                                                                                                                                                                                                                                                                                                                                                                                             |
| 7. <i>Vibrio shilonii</i>             |                                                                                                                                                                                                                                                                                                                                                                                                                                             |
| 8. <i>Vibrio harveyi</i>              |                                                                                                                                                                                                                                                                                                                                                                                                                                             |
| 9. <i>Vibrio fischeri</i>             |                                                                                                                                                                                                                                                                                                                                                                                                                                             |
| 10. <i>Vibrio splendidus</i>          |                                                                                                                                                                                                                                                                                                                                                                                                                                             |

Note: **Supplementary Table 3** was placed in a separated file.

**Supplementary Table 4.** Conservation level comparison of sRCRs and RIGRs

| <b>(A) <i>B. subtilis</i></b> | Conservation level within <i>Bacillus</i>       |                                                                          |
|-------------------------------|-------------------------------------------------|--------------------------------------------------------------------------|
|                               | sRNA-coding section of intergenic region (sRCR) | Random section of intergenic region excluding sRNA-coding section (RIGR) |
| Intergenic Region Coordinates |                                                 |                                                                          |
| 1018468_1018998               | 3                                               | 3                                                                        |
| 1056216_1056702               | 3                                               | 1                                                                        |
| 1076952_1077440               | 3                                               | 3                                                                        |
| 1150427_1150850               | 1                                               | 1                                                                        |
| 1219105_1219849 (length 100)  | 3                                               | 3                                                                        |
| 1219105_1219849 (length 241)  | 8                                               | 1                                                                        |
| 1233300_1233614               | 8                                               | 4                                                                        |
| 1435245_1435628               | 3                                               | 1                                                                        |
| 1446568_1447251               | 2                                               | 1                                                                        |
| 1451135_1451371               | 2                                               | 1                                                                        |
| 1467411_1467805               | 2                                               | 1                                                                        |
| 1483471_1484117               | 5                                               | 1                                                                        |



|                 |    |   |
|-----------------|----|---|
| 1527902_1528326 | 5  | 3 |
| 1596300_1596474 | 5  | 2 |
| 1780220_1780618 | 1  | 1 |
| 1868374_1868617 | 3  | 1 |
| 1900514_1901117 | 1  | 1 |
| 1901737_1902219 | 1  | 1 |
| 1917097_1917639 | 1  | 1 |
| 1925421_1925655 | 3  | 2 |
| 204890_205409   | 5  | 1 |
| 2053929_2054599 | 3  | 1 |
| 2069029_2069262 | 1  | 1 |
| 2069561_2070244 | 4  | 3 |
| 2078626_2079214 | 5  | 1 |
| 2099790_2100147 | 3  | 1 |
| 2208528_2208855 | 2  | 1 |
| 2225615_2227297 | 3  | 3 |
| 2282485_2283136 | 1  | 1 |
| 2283651_2283858 | 2  | 1 |
| 2316110_2316446 | 2  | 1 |
| 2540824_2541051 | 3  | 1 |
| 2692851_2692933 | 1  | 1 |
| 2734143_2734953 | 2  | 1 |
| 2751726_2752167 | 2  | 1 |
| 275561_275838   | 2  | 1 |
| 2913338_2913661 | 2  | 2 |
| 3072110_3072401 | 1  | 1 |
| 3105043_3105470 | 4  | 3 |
| 3145958_3146238 | 2  | 1 |
| 3302763_3303042 | 1  | 1 |
| 3572889_3573207 | 5  | 3 |
| 3625507_3625741 | 2  | 1 |
| 3631572_3631763 | 1  | 3 |
| 3738217_3738343 | 1  | 1 |
| 3851893_3852186 | 3  | 1 |
| 3856172_3857017 | 6  | 2 |
| 3988763_3989232 | 4  | 1 |
| 3999097_3999350 | 11 | 3 |
| 4035607_4035990 | 2  | 1 |
| 4122849_4123193 | 2  | 1 |
| 4171789_4172259 | 1  | 1 |
| 4187174_4187681 | 4  | 1 |
| 474225_474731   | 7  | 3 |
| 532552_532922   | 2  | 2 |
| 554475_554669   | 1  | 1 |
| 559464_560151   | 12 | 6 |
| 663027_663601   | 1  | 1 |
| 678951_679390   | 2  | 1 |
| 694281_694662   | 4  | 2 |

| (B) <i>S. pyogenes</i>        | Conservation level within <i>Streptococcus</i>  |                                                                          |
|-------------------------------|-------------------------------------------------|--------------------------------------------------------------------------|
|                               | sRNA-coding section of intergenic region (sRCR) | Random section of intergenic region excluding sRNA-coding section (RIGR) |
| Intergenic Region Coordinates |                                                 |                                                                          |
| 125779_125973                 | 1                                               | 1                                                                        |
| 195504_196059                 | 6                                               | 3                                                                        |
| 214258_214798                 | 6                                               | 2                                                                        |
| 257186_257517                 | 1                                               | 1                                                                        |
| 270844_271455                 | 1                                               | 1                                                                        |
| 277177_277431                 | 1                                               | 1                                                                        |
| 335986_336478                 | 1                                               | 1                                                                        |
| 358476_358935                 | 1                                               | 1                                                                        |
| 558841_559706                 | 1                                               | 1                                                                        |
| 638386_638734                 | 1                                               | 1                                                                        |
| 914250_914572                 | 6                                               | 1                                                                        |
| 961799_962205                 | 2                                               | 3                                                                        |
| 968871_969241                 | 1                                               | 1                                                                        |
| 1016199_1016649               | 1                                               | 1                                                                        |
| 1018348_1018705               | 2                                               | 1                                                                        |
| 1173257_1173399               | 3                                               | 3                                                                        |
| 1175357_1176511               | 1                                               | 1                                                                        |
| 1251734_1252159               | 8                                               | 2                                                                        |
| 1354931_1355292               | 1                                               | 1                                                                        |
| 1532755_1533053               | 1                                               | 1                                                                        |
| 1603784_1604445               | 23                                              | 1                                                                        |
| 1678751_1679185               | 3                                               | 3                                                                        |
| 1719722_1720207               | 1                                               | 1                                                                        |
| 1719722_1720208               | 3                                               | 1                                                                        |
| 1719722_1720209               | 3                                               | 2                                                                        |
| 1719722_1720210               | 1                                               | 2                                                                        |
| 1719722_1720211               | 7                                               | 1                                                                        |
| 1719722_1720212               | 1                                               | 1                                                                        |

**Supplementary Table 6. Minimum length of long intergenic regions with different thresholds in each species**

**\*: The average length of all intergenic regions longer than 60 base pairs.**

| Species                 | Size of genome ( $\times 10^6$ bp) | # of total intergenic region | Average length* | length of intergenic regions within top 20% long |
|-------------------------|------------------------------------|------------------------------|-----------------|--------------------------------------------------|
| <i>B. subtilis</i>      | 4.2                                | 2167                         | 188 bp          | $\geq 252$ bp                                    |
| <i>C. trachomatis</i>   | 1                                  | 393                          | 195 bp          | $\geq 280$ bp                                    |
| <i>E. coli</i>          | 4.6                                | 2327                         | 215 bp          | $\geq 302$ bp                                    |
| <i>E. faecalis</i>      | 3.2                                | 1547                         | 229 bp          | $\geq 282$ bp                                    |
| <i>H. pylori</i>        | 1.6                                | 615                          | 205 bp          | $\geq 282$ bp                                    |
| <i>L. monocytogenes</i> | 2.9                                | 1447                         | 162 bp          | $\geq 242$ bp                                    |
| <i>M. bovis</i>         | 4.3                                | 1991                         | 185 bp          | $\geq 260$ bp                                    |

|               |     |      |        |         |
|---------------|-----|------|--------|---------|
| P. aeruginosa | 6.2 | 3016 | 206 bp | ≥282 bp |
| S. aureus     | 2.8 | 1548 | 270 bp | ≥381 bp |
| S. pneumoniae | 2.2 | 1101 | 235 bp | ≥300 bp |
| S. pyogenes   | 1.8 | 963  | 204 bp | ≥287 bp |
| S. typhi      | 4.7 | 2271 | 235 bp | ≥325 bp |
| V. cholerae   | 5   | 2112 | 190 bp | ≥265 bp |
